# Supplementary material for: Development and validation of an expanded antibody toolset that captures alpha-synuclein pathological diversity in Lewy body diseases
Source: PubMed Central journal article supplement (PMC10703845; doi:10.1038/s41531-023-00604-y), 2023-12-07
Supplement: 41531_2023_604_MOESM1_ESM.pdf [file 41531_2023_604_MOESM1_ESM.pdf]

# SUPPLEMENTARY INFORMATION

## Development and validation of an expanded antibody toolset that captures alpha-synuclein pathological diversity in Lewy body diseases

Melek Firat Altay<sup>1,2</sup>, Senthil T. Kumar<sup>1</sup>, Johannes Bartscher<sup>1</sup>, Somanath Jagannath<sup>1</sup>, Catherine Strand<sup>3</sup>, Yasuo Miki<sup>3,6</sup>, Laura Parkkinen<sup>4,5</sup>, Janice L. Holton<sup>3</sup>, Hilal A. Lashuel<sup>\*1</sup>

<sup>1</sup> Laboratory of Molecular and Chemical Biology of Neurodegeneration, Brain Mind Institute, EPFL, Lausanne, Switzerland

<sup>2</sup> Department of Human Genetics, Inselspital, Bern University Hospital, University of Bern, Bern, Switzerland

<sup>3</sup> Queen Square Brain Bank for Neurological Disorders, University College London Queen Square Institute of Neurology, London, England

<sup>4</sup> Oxford Parkinson's Disease Centre, University of Oxford, Oxford, UK

<sup>5</sup> Nuffield Department of Clinical Neurosciences, University of Oxford, Oxford, UK

<sup>6</sup> Department of Neuropathology, Institute of Brain Science, Hirosaki University Graduate School of Medicine, Hirosaki 036-8562, Japan

Running title: unmasking alpha-synuclein pathologies in Lewy body diseases

\*To whom correspondence should be addressed: Laboratory of Molecular and Chemical Biology of Neurodegeneration, Brain Mind Institute, Ecole Polytechnique Fédérale de Lausanne, 1015 Lausanne. Tel: +41216939691, Fax: +41216939665.

e-mail: [hilal.lashuel@epfl.ch](mailto:hilal.lashuel@epfl.ch)

Keywords: alpha-synuclein, Parkinson's disease, Lewy body diseases, post-translational modification, neuropathology, aggregation

# SUPPLEMENTARY FIGURES

## SUPPLEMENTARY FIGURE 1

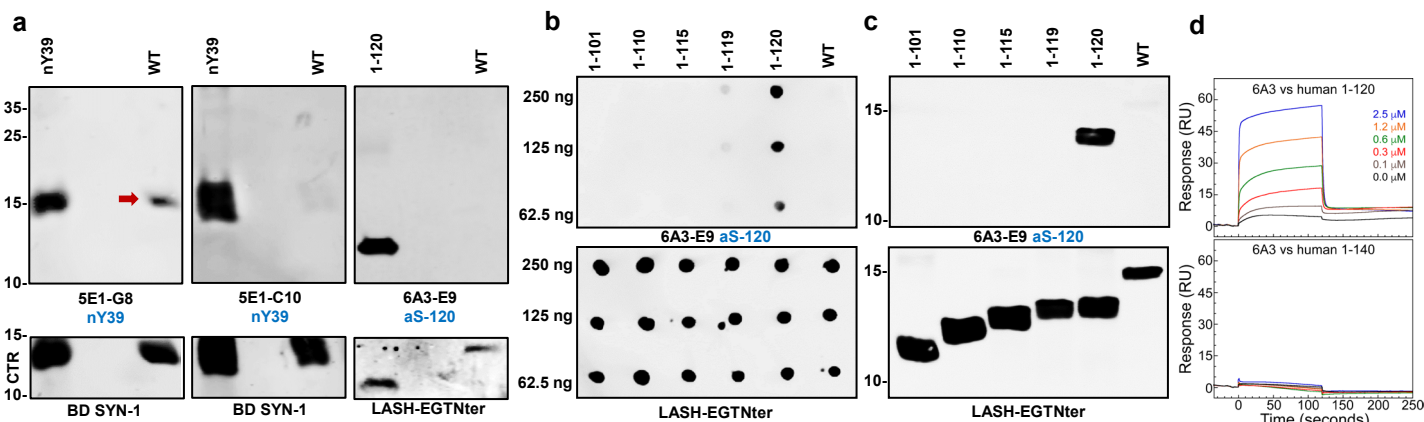

**Supplementary Figure 1: Specificity validation of the novel aSyn PTM antibodies using human recombinant aSyn standards.** Novel monoclonal aSyn PTM antibodies were validated by (a) WB screening. The 5E1-G8 antibody showed non-specific positivity to aSyn WT by WB (red arrow). Further (b) DB and (c) WB analyses on 6A3-E9 showed that this antibody is specific to human aSyn truncated at residue 120. (d) SPR sensograms showed the binding responses of immobilized antibody 6A3-E9 against varying concentrations of aSyn human 1-120 (top) or aSyn human WT (bottom). aSyn = alpha-synuclein; CTR = control; DB = dot/slot blot; PTM = post-translational modification; SPR = surface plasmon resonance; WB = Western blot; WT = wild-type

# SUPPLEMENTARY FIGURE 2

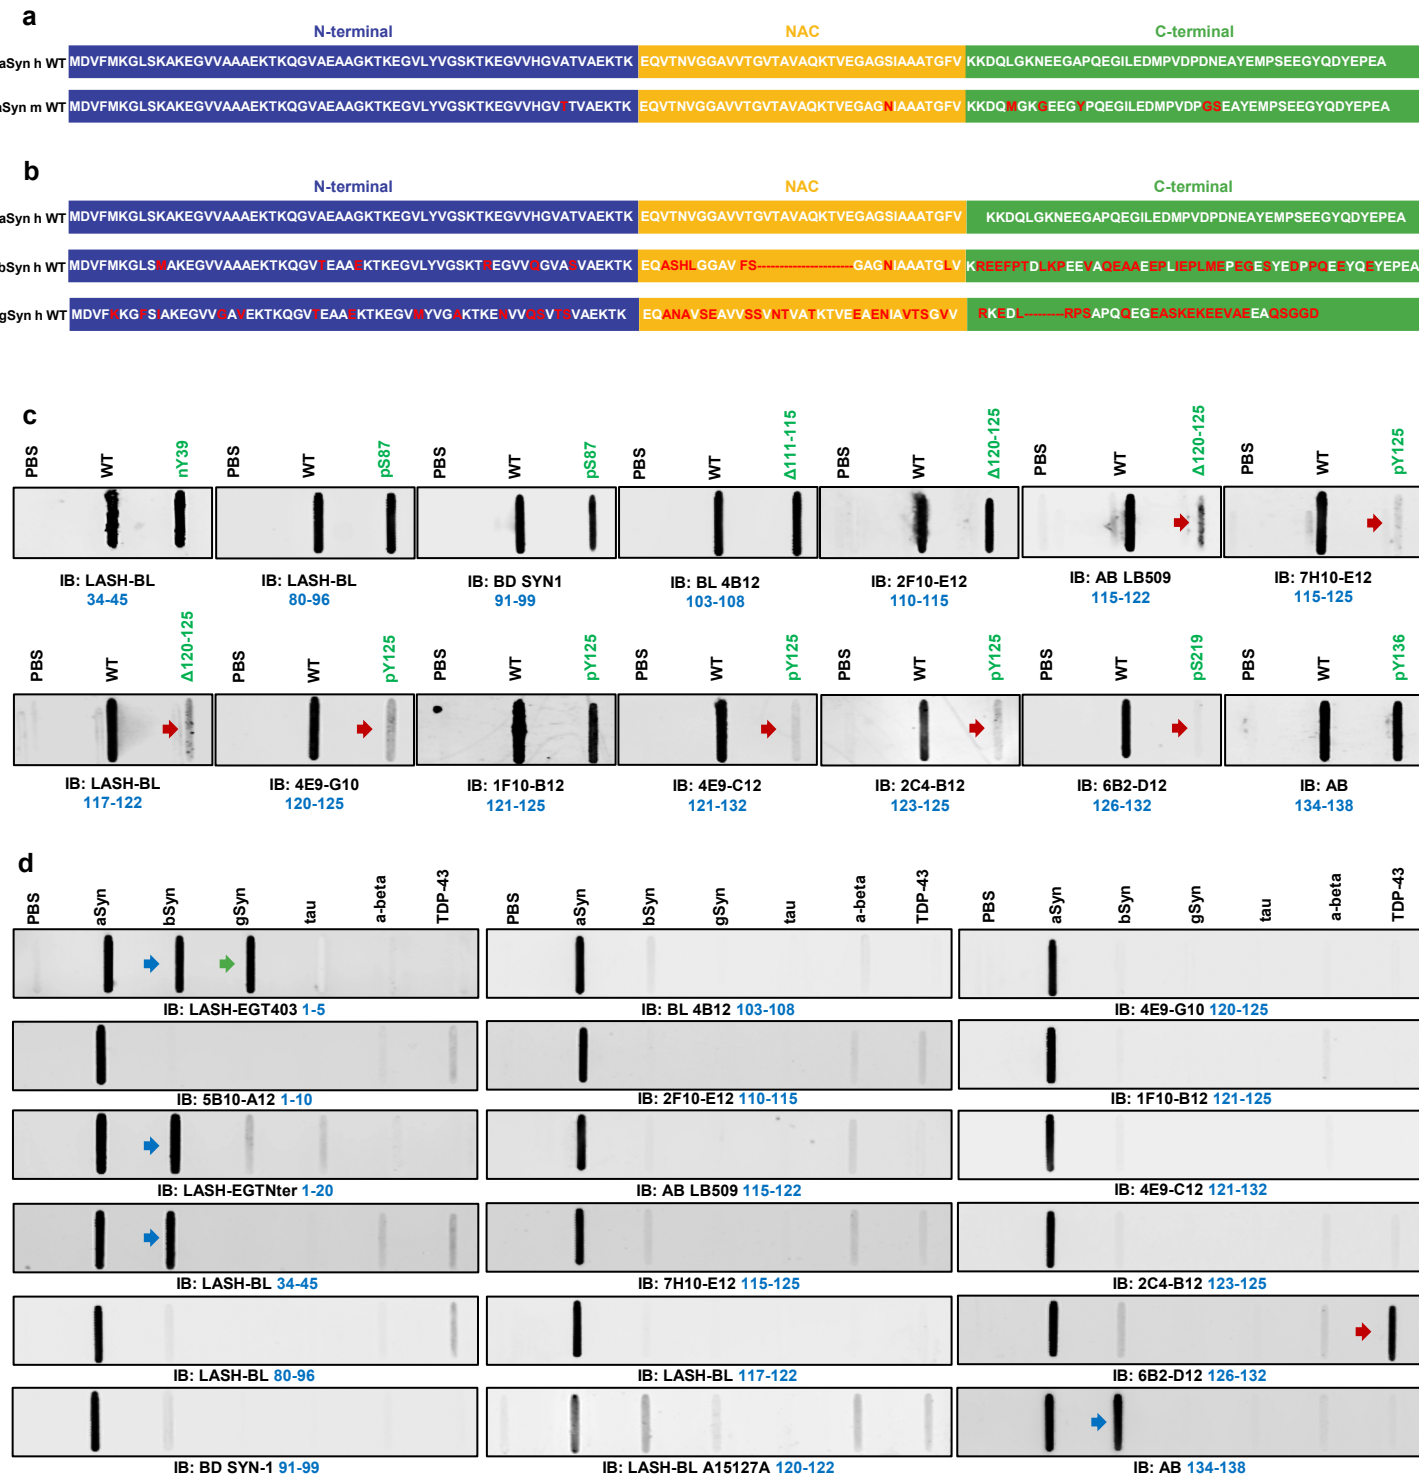

**Supplementary Figure 2: aSyn antibody sensitivity to neighboring aSyn PTMs, reactivity to other synuclein family proteins and amyloidogenic proteins.** (a) The amino acid sequence of aSyn human and its mouse orthologue. (b) The synuclein family comprises three homologous proteins – aSyn, bSyn and gSyn. The residue differences are highlighted in red. (c) The sensitivities of non-modified aSyn antibodies to PTMs neighboring or overlapping their epitopes were explored by DB (red arrows). Protein loading control was run via Ponceau S staining. (d) Reactivity of the non-modified aSyn antibodies to other members of the synuclein family and to other amyloidogenic proteins tau (1N4R), a-beta 42 and TDP-43 were studied by DB. Protein loading control was run via Ponceau S staining. Blue arrows indicate reactivity to bSyn, green arrows to gSyn and red arrows cross-reactivity to other amyloidogenic proteins. a-beta = amyloid-beta; aSyn = alpha-synuclein; bSyn = beta-synuclein; DB = dot/slot blot; gSyn = gamma-synuclein; h = human; IB = immunoblot; m = mouse; NAC = non-amyloid component; PBS = phosphate buffered saline; PTM = post-translational modification; tau = tubulin-associated unit; TDP-43 = transactive response DNA-binding protein 43kDa; WT = wild-type

**SUPPLEMENTARY FIGURE 3**

**HIPPOCAMPUS**

**CORTEX**

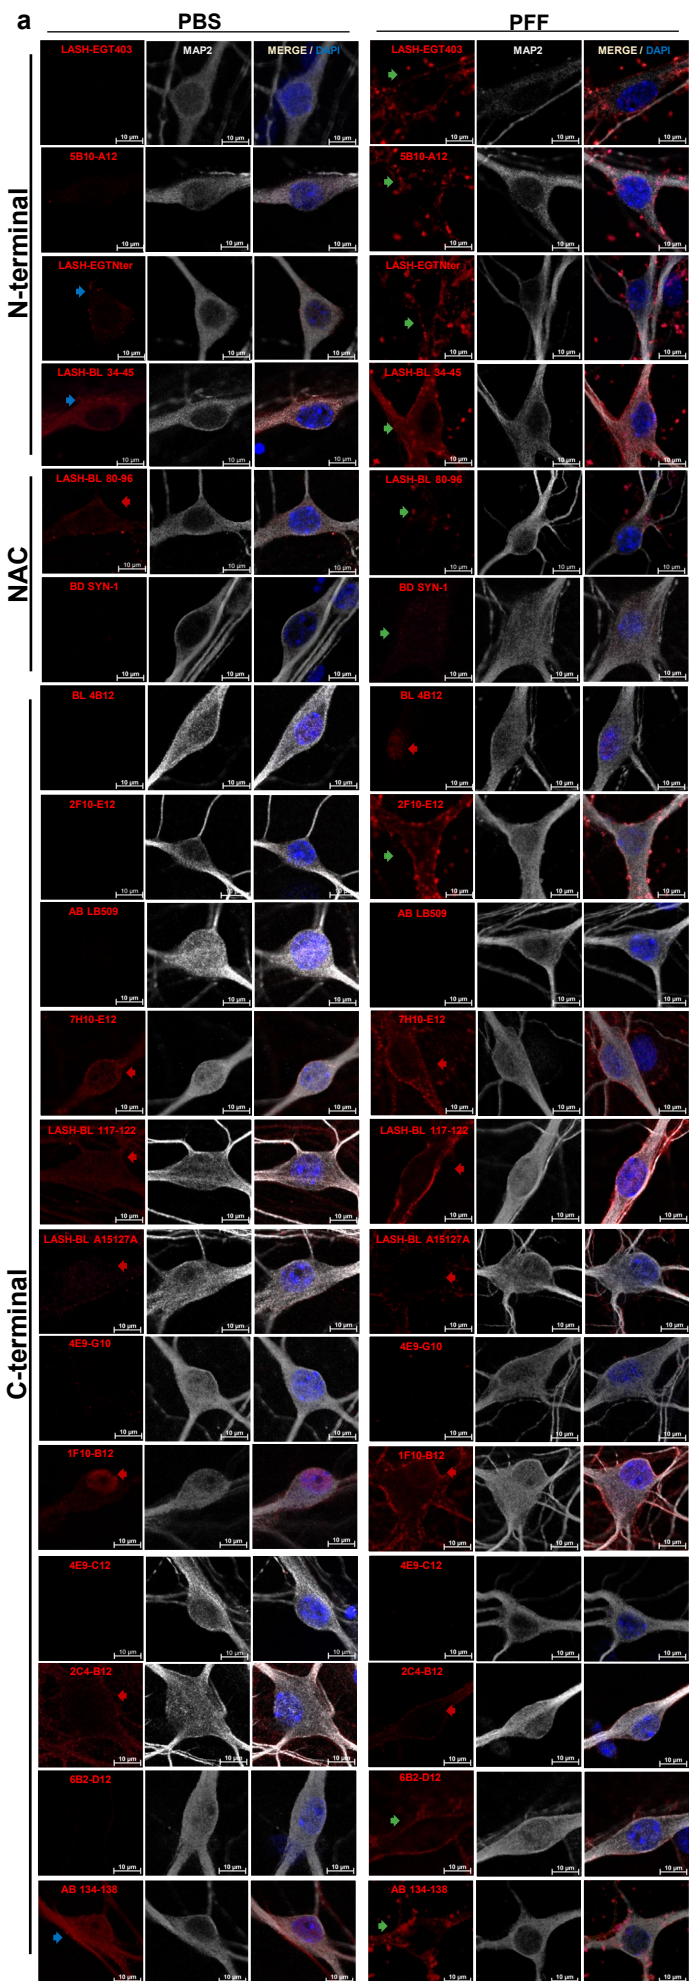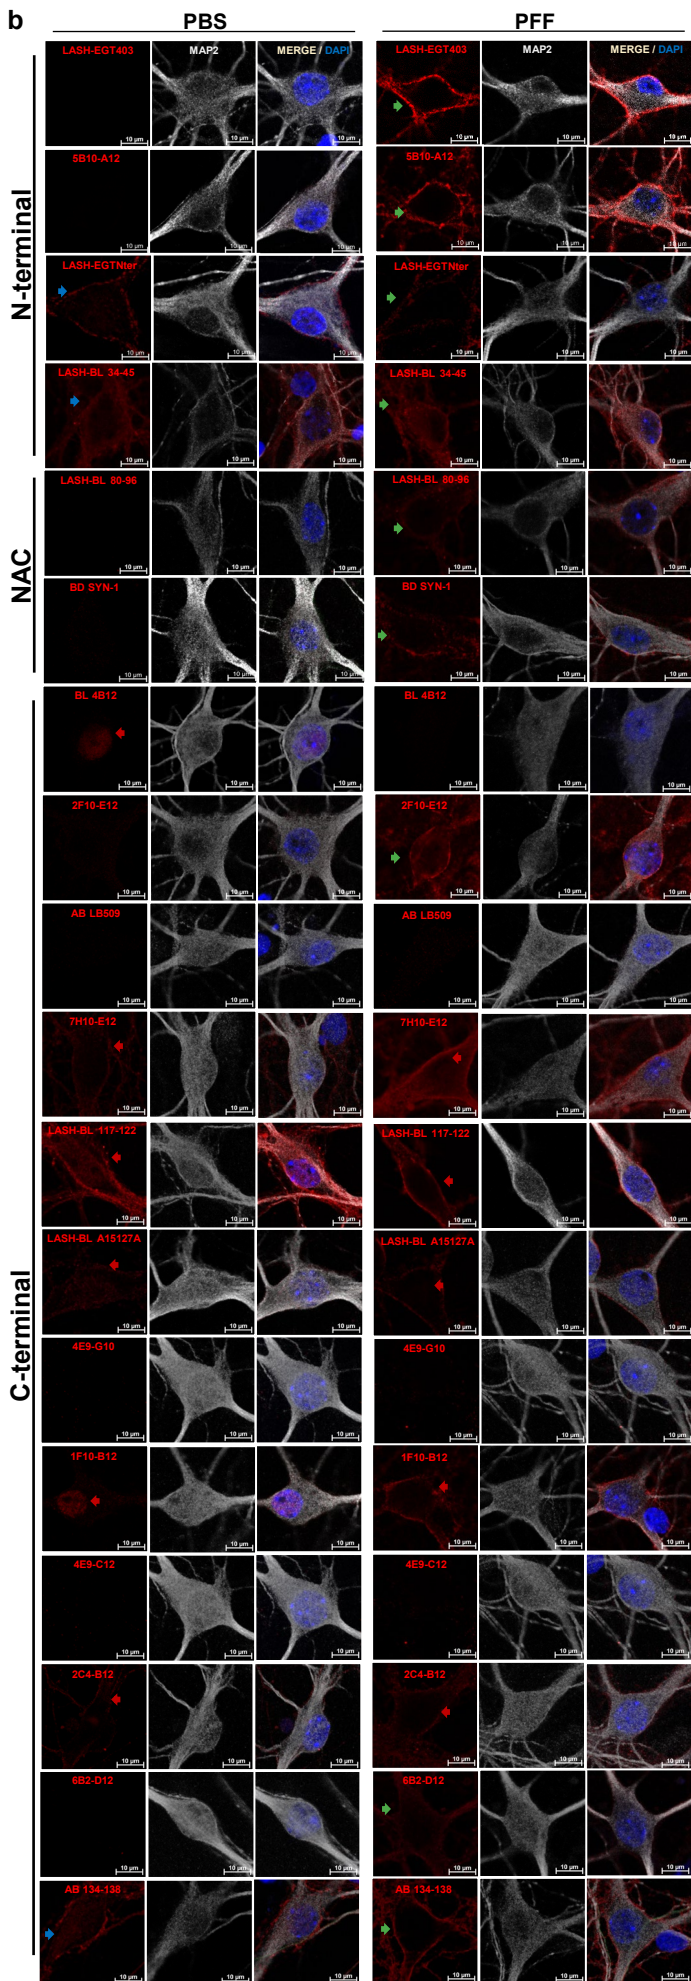

**Supplementary Figure 3: Specificity validation of non-modified aSyn antibodies on aSyn KO hippocampal and cortical neurons by ICC.** PBS- and PFF-treated aSyn KO **(a)** hippocampal and **(b)** cortical neurons were immunostained to validate the specificity of the antibodies with epitopes against the N-terminus, NAC region and C-terminus of aSyn. Blue arrows indicate bSyn positivity in PBS-treated neurons, green arrows indicate positivity to aSyn mouse WT fibrils in PFF-treated neurons, and red arrows indicate non-specific background both in PBS- and PFF-treated neurons. aSyn = alpha-synuclein; bSyn = beta-synuclein; DAPI = 4',6-diamidino-2-phenylindole; ICC= immunocytochemistry; KO = knockout; NAC = non-amyloid component; MAP2 = microtubule-associated protein 2; PBS = phosphate buffered saline; PFF = pre-formed fibril; WT = wild-type

**SUPPLEMENTARY FIGURE 4**

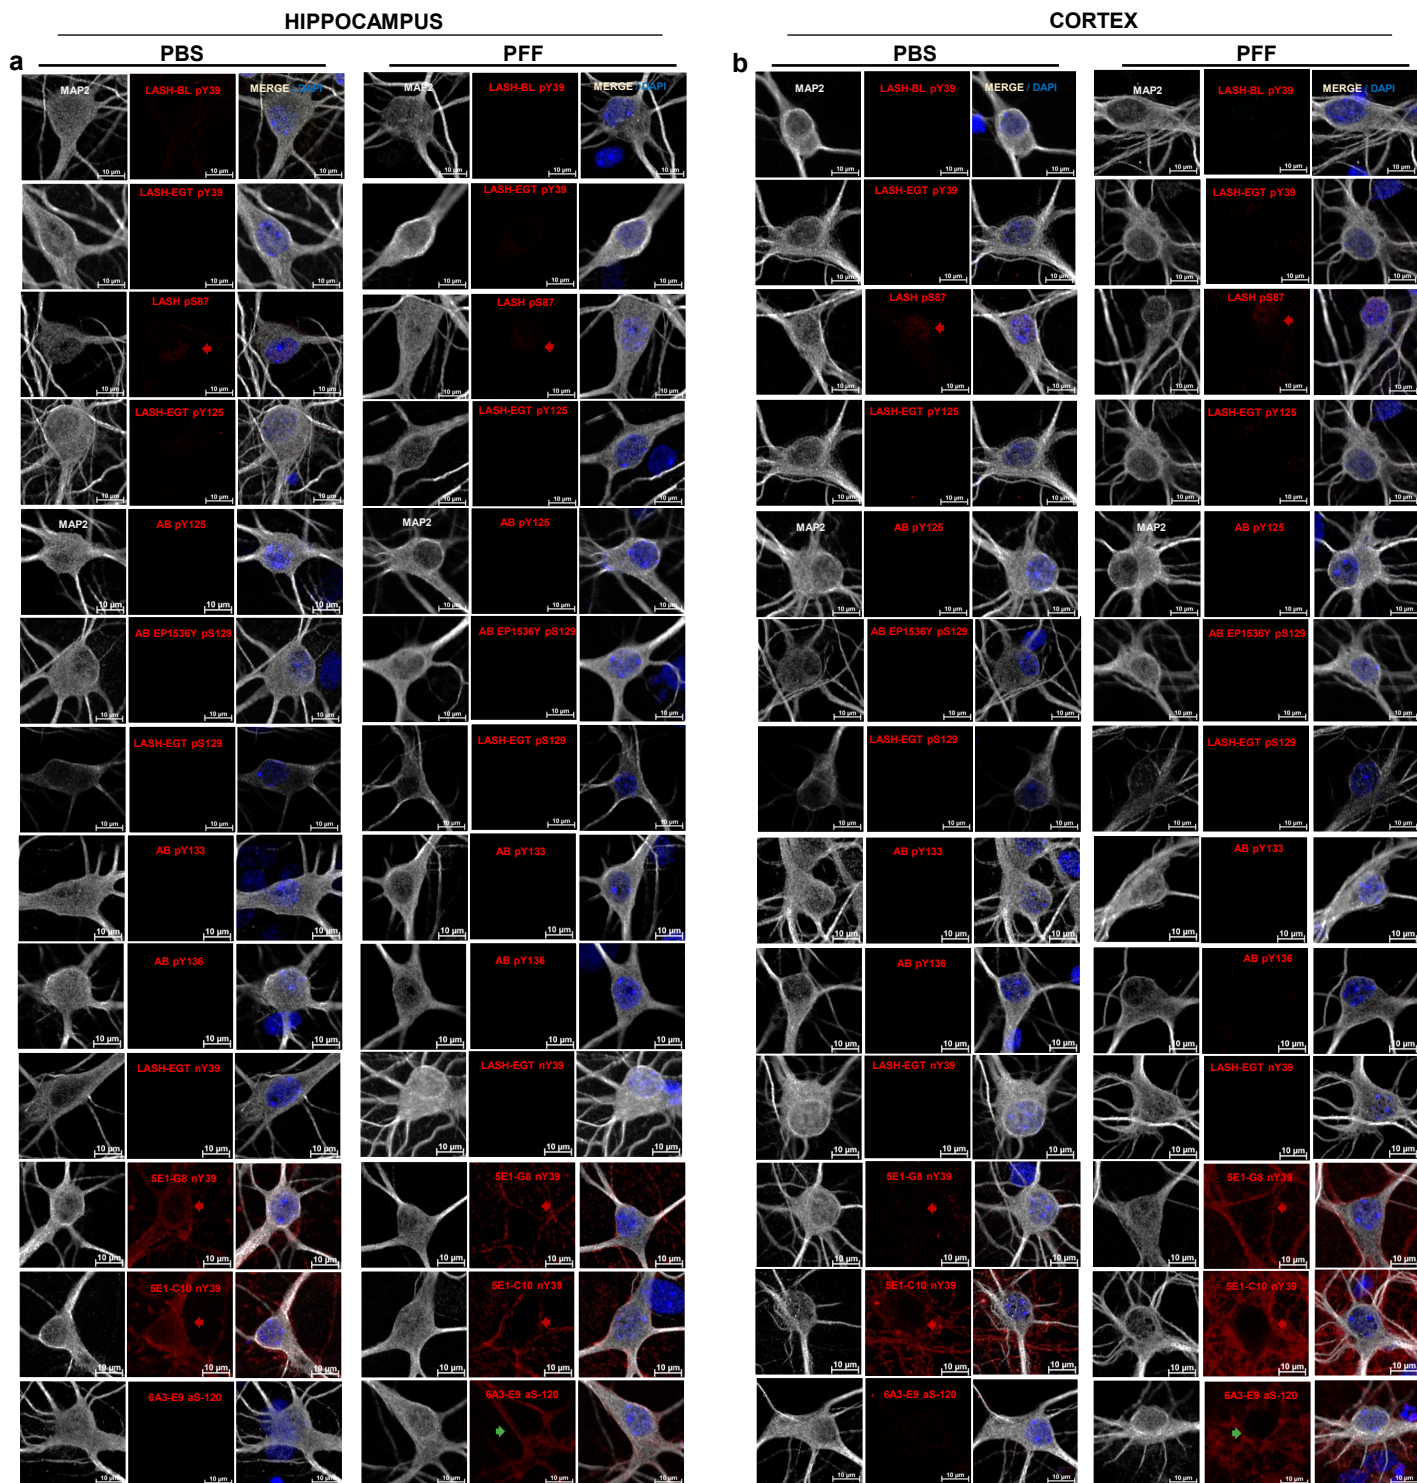

**Supplementary Figure 4: Specificity validation of aSyn PTM antibodies on aSyn KO hippocampal and cortical neurons by ICC.** PBS- and PFF-treated aSyn KO (a) hippocampal and (b) cortical neurons were immunostained to validate the specificity of the antibodies with epitopes against the PTMs of aSyn. Green arrows indicate positivity to aSyn mouse WT fibrils in PFF-treated neurons, and red arrows indicate non-specific background both in PBS- and PFF-treated neurons. aSyn = alpha-synuclein; bSyn = beta-synuclein; DAPI = 4',6-diamidino-2-phenylindole; ICC = immunocytochemistry; KO = knockout; MAP2 = microtubule-associated protein 2; PBS = phosphate buffered saline; PFF = pre-formed fibril; PTM = post-translational modification; WT = wild-type

**SUPPLEMENTARY FIGURE 5**

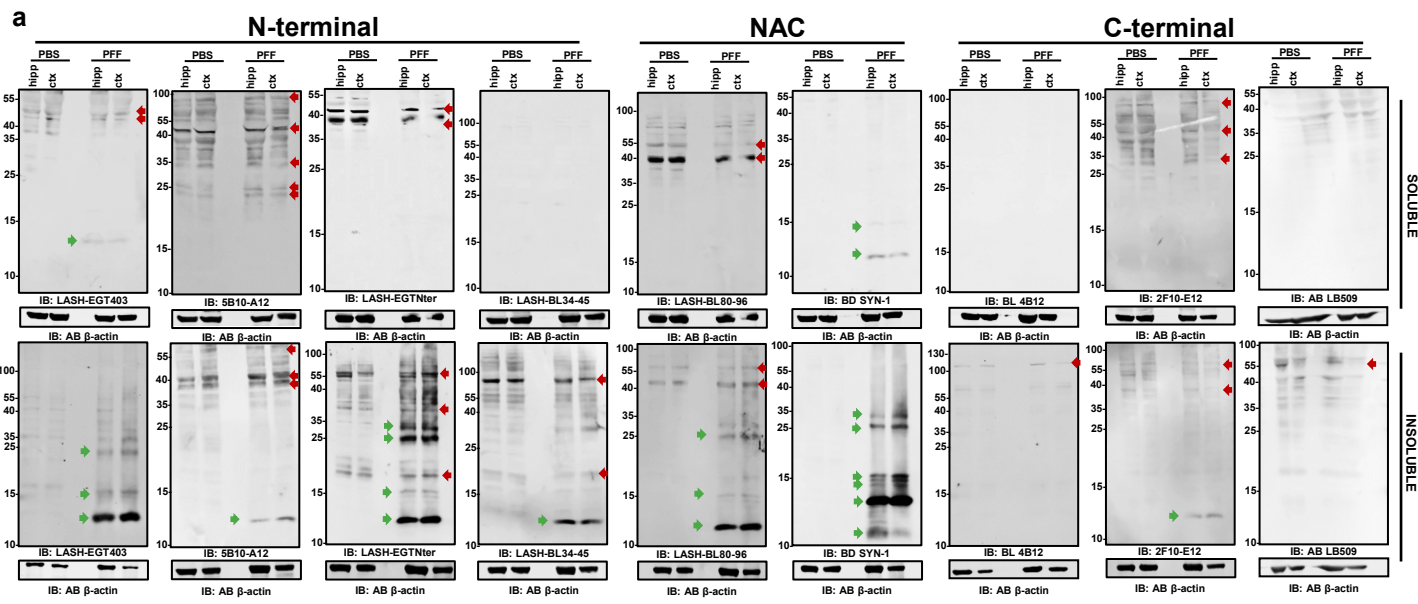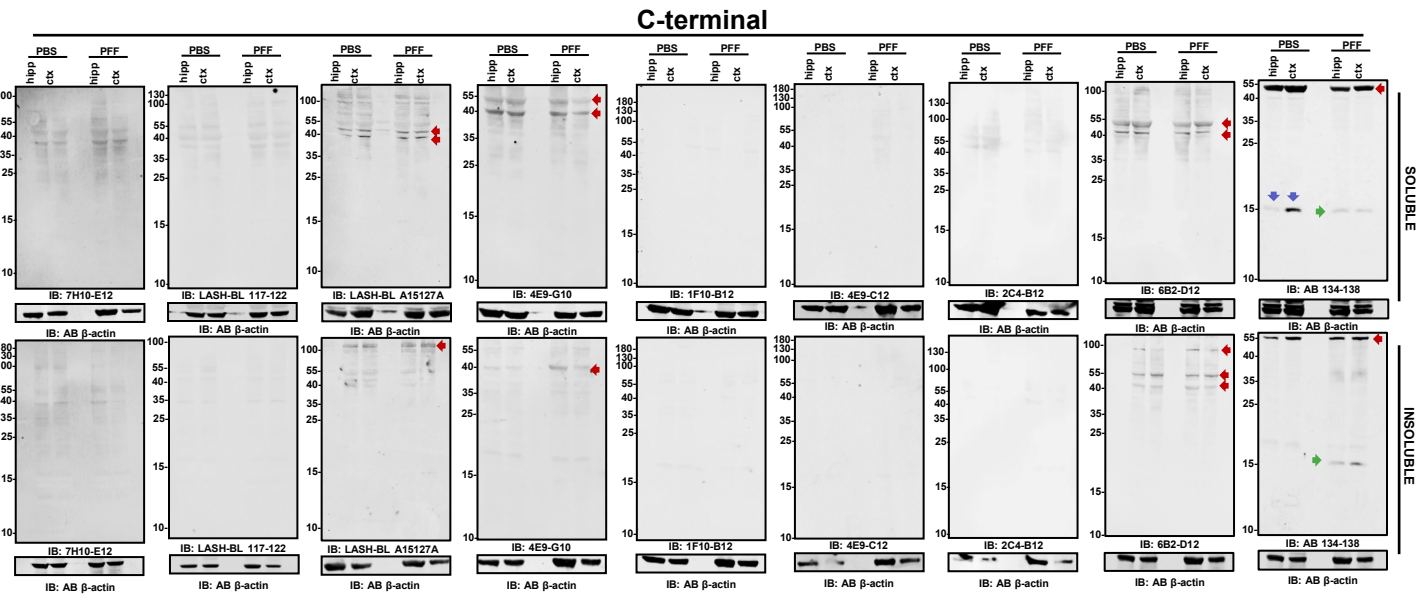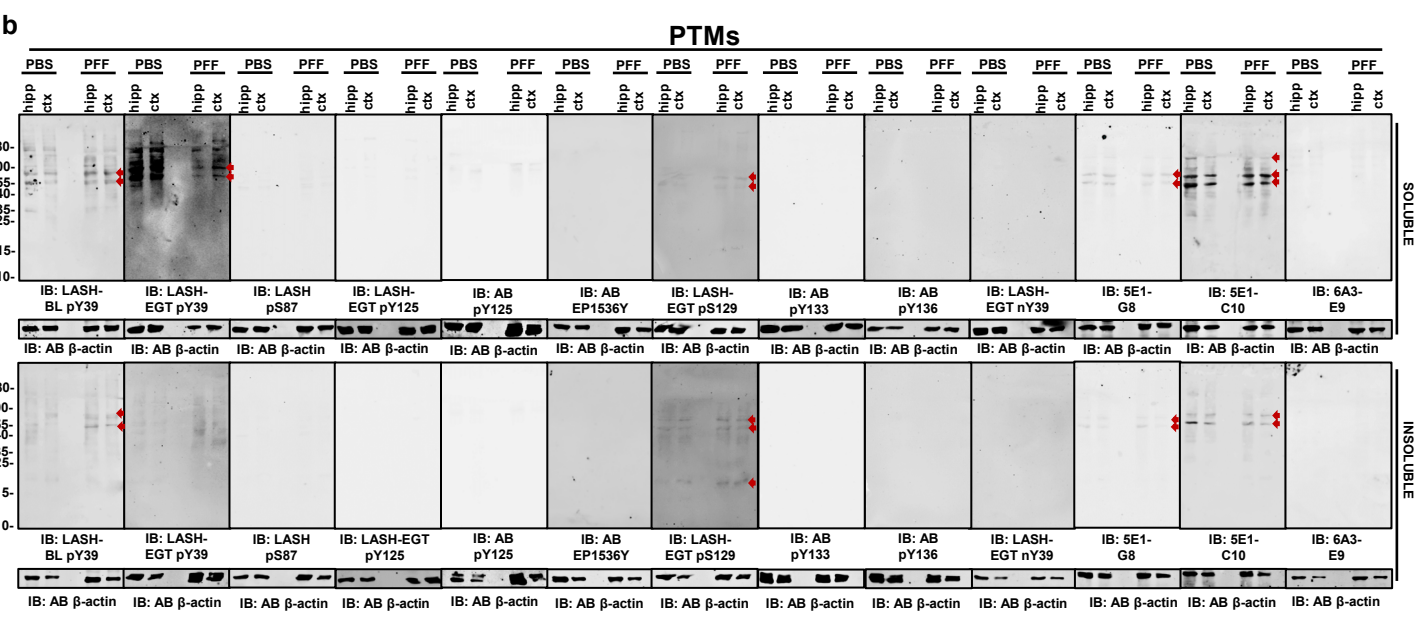

**Supplementary Figure 5: Specificity validation of aSyn antibodies on aSyn KO hippocampal and cortical neurons by WB.** PBS- and PFF-treated aSyn KO hippocampal and cortical neurons were separated to soluble and insoluble fractions by sequential extraction and stained using **(a)** non-modified and **(b)** aSyn PTM antibodies for specificity validation. Green arrows indicate bands specific to aSyn mouse WT fibrils, blue arrows indicate bSyn-specific bands, and red arrows indicate non-specific background. aSyn = alpha-synuclein; bSyn = beta-synuclein; ctx = cortex; hipp = hippocampus; IB = immunoblot; NAC = non-amyloid component; KO = knockout; PBS = phosphate buffered saline; PFF = pre-formed fibril; PTM = post-translational modification; WB = Western blot; WT = wild-type



**SUPPLEMENTARY FIGURE 6**

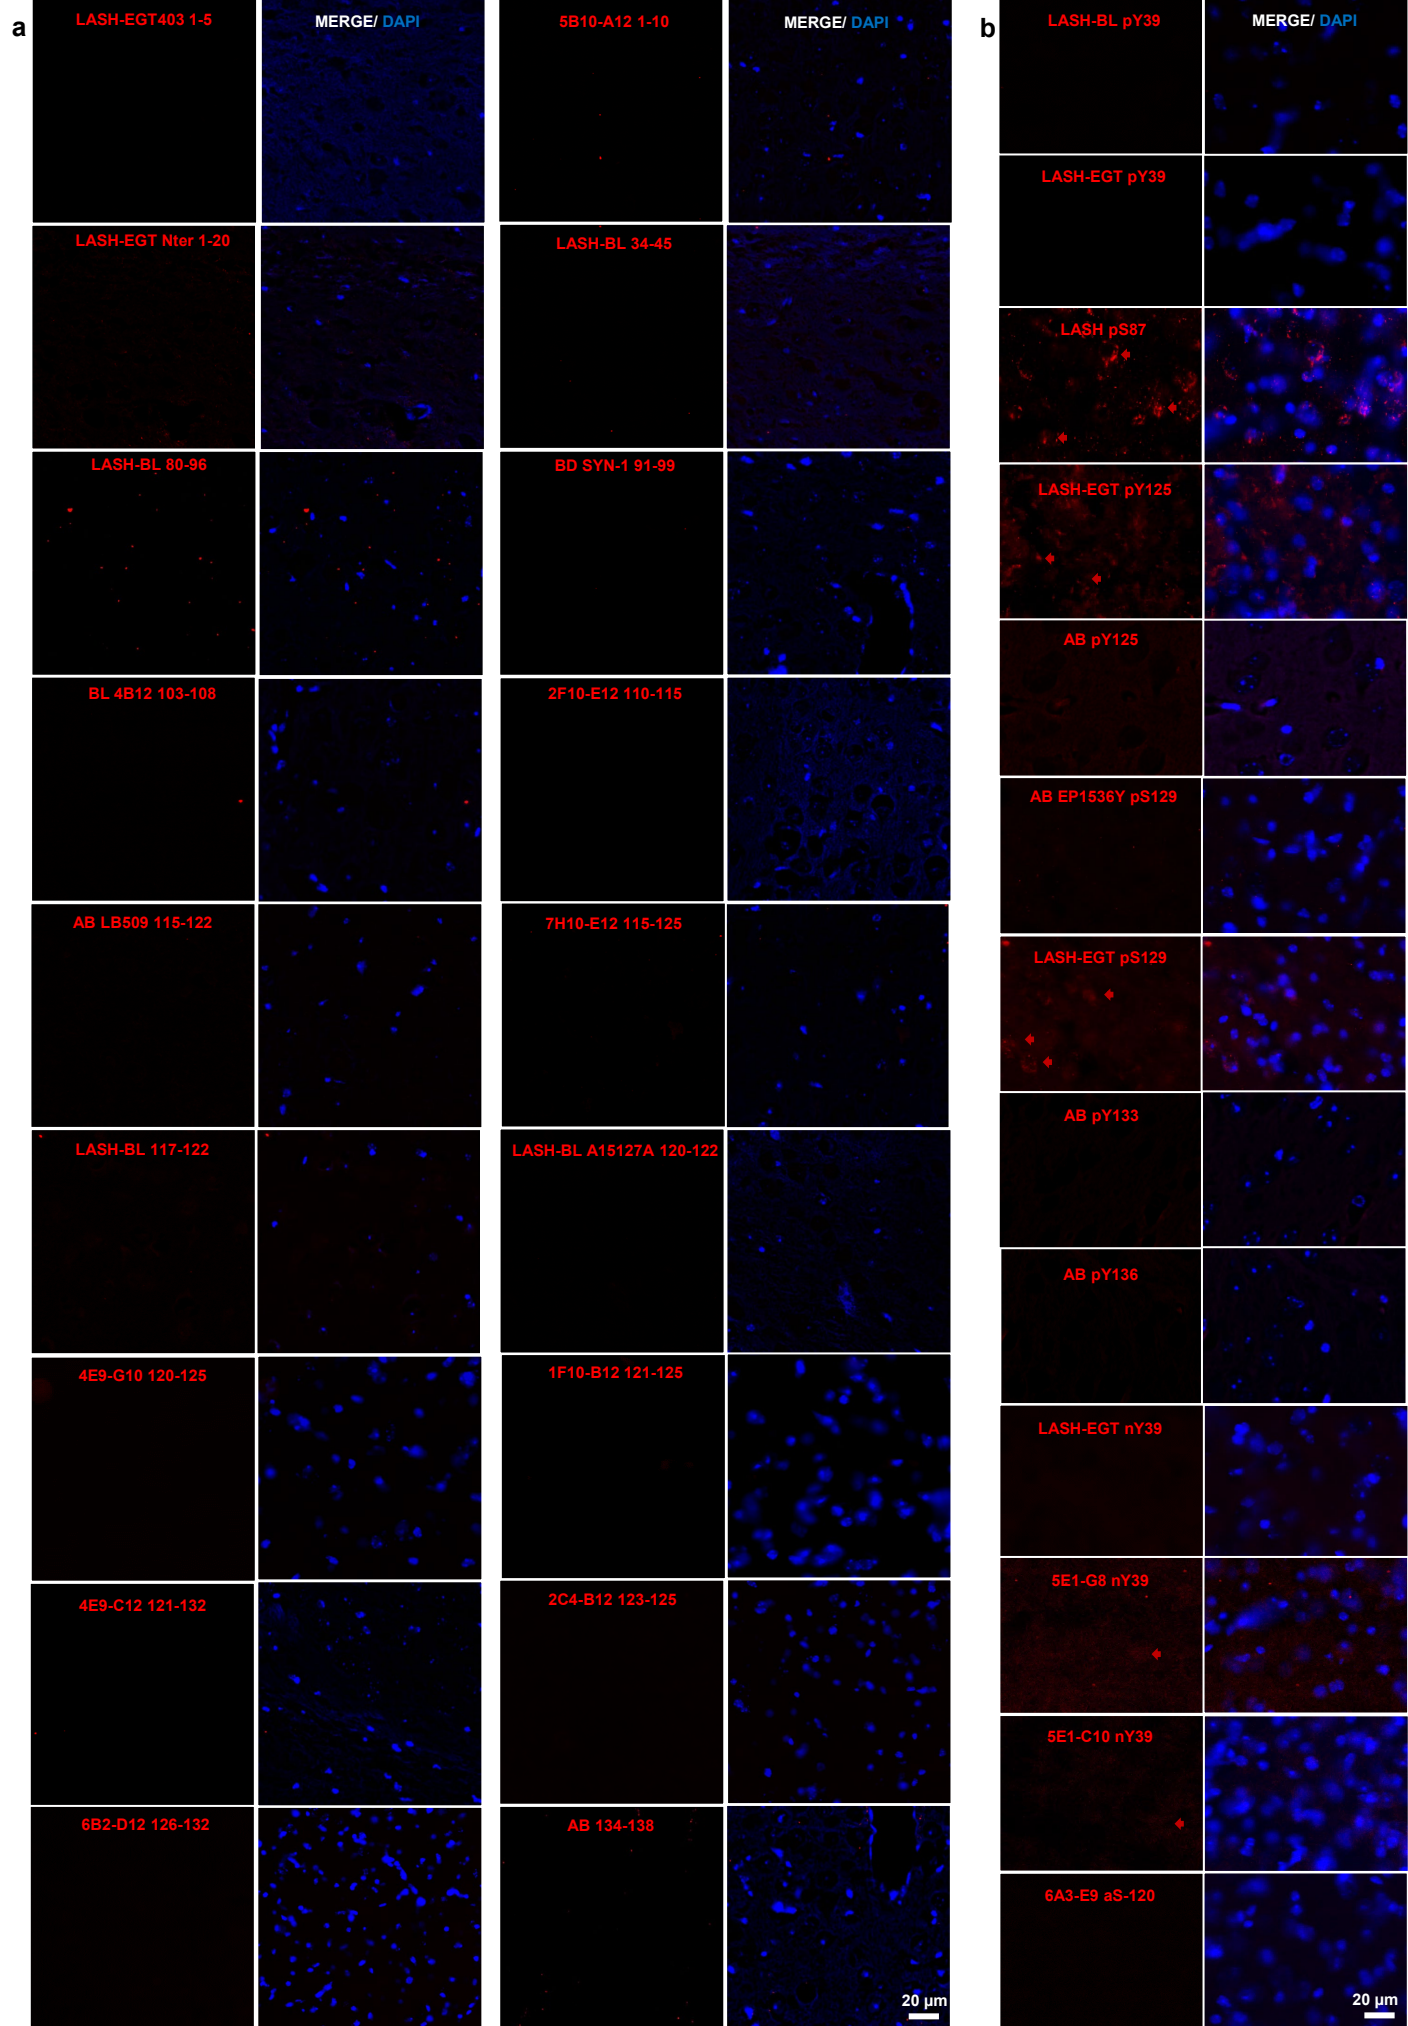

**Supplementary Figure 6: Specificity validation of aSyn antibodies on aSyn KO mouse brain tissue by IF.** The in-house and commercial antibodies against **(a)** non-modified aSyn and **(b)** aSyn PTMs were screened for their specificity using aSyn KO mouse amygdala sections. Red arrows indicate non-specific background. aSyn = alpha-synuclein; DAPI = 4',6-diamidino-2-phenylindole; IF = immunofluorescence; KO = knockout; PTM = post-translational modification

**SUPPLEMENTARY FIGURE 7**

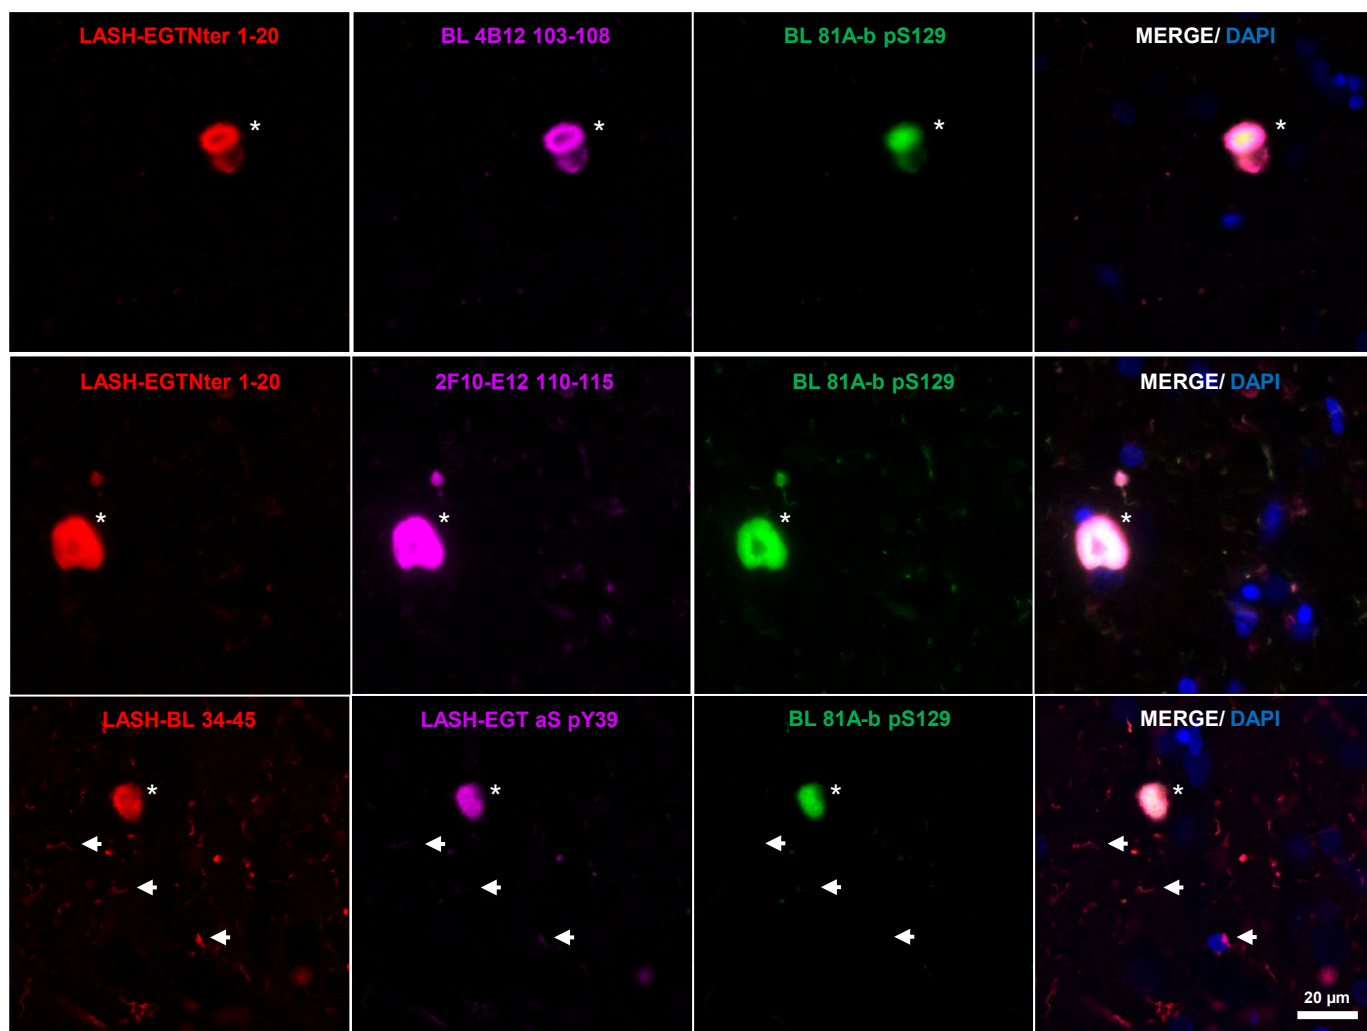

**Supplementary Figure 7: IF labelling of PD cingulate cortex using the aSyn N-terminal LASH-EGTNter 1-20 or LASH-BL 34-45, aSyn C-terminal BL 4B12 103-108 or AB 134-138, and aSyn pS129 BL 81A-biotin antibodies.** LBs are marked with asterisks, and LNs with arrows. Representative images from PD1 cingulate cortex are taken using Leica DM5500 B upright microscope at 20x magnification. aSyn = alpha-synuclein; DAPI = 4',6-diamidino-2-phenylindole; IF = immunofluorescence; IHC = immunohistochemistry; LB = Lewy body; LN = Lewy neurite; PD = Parkinson's disease

# SUPPLEMENTARY FIGURE 8

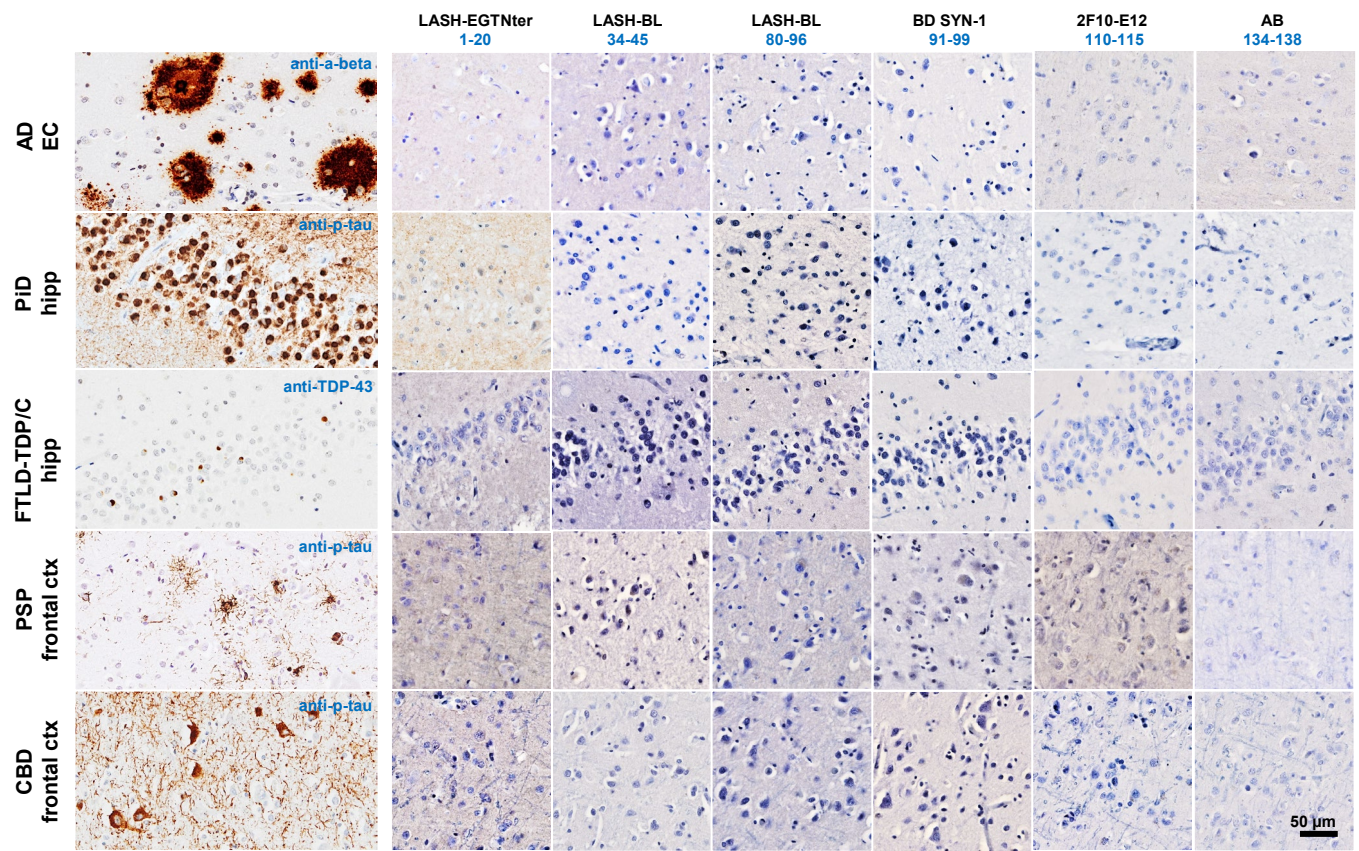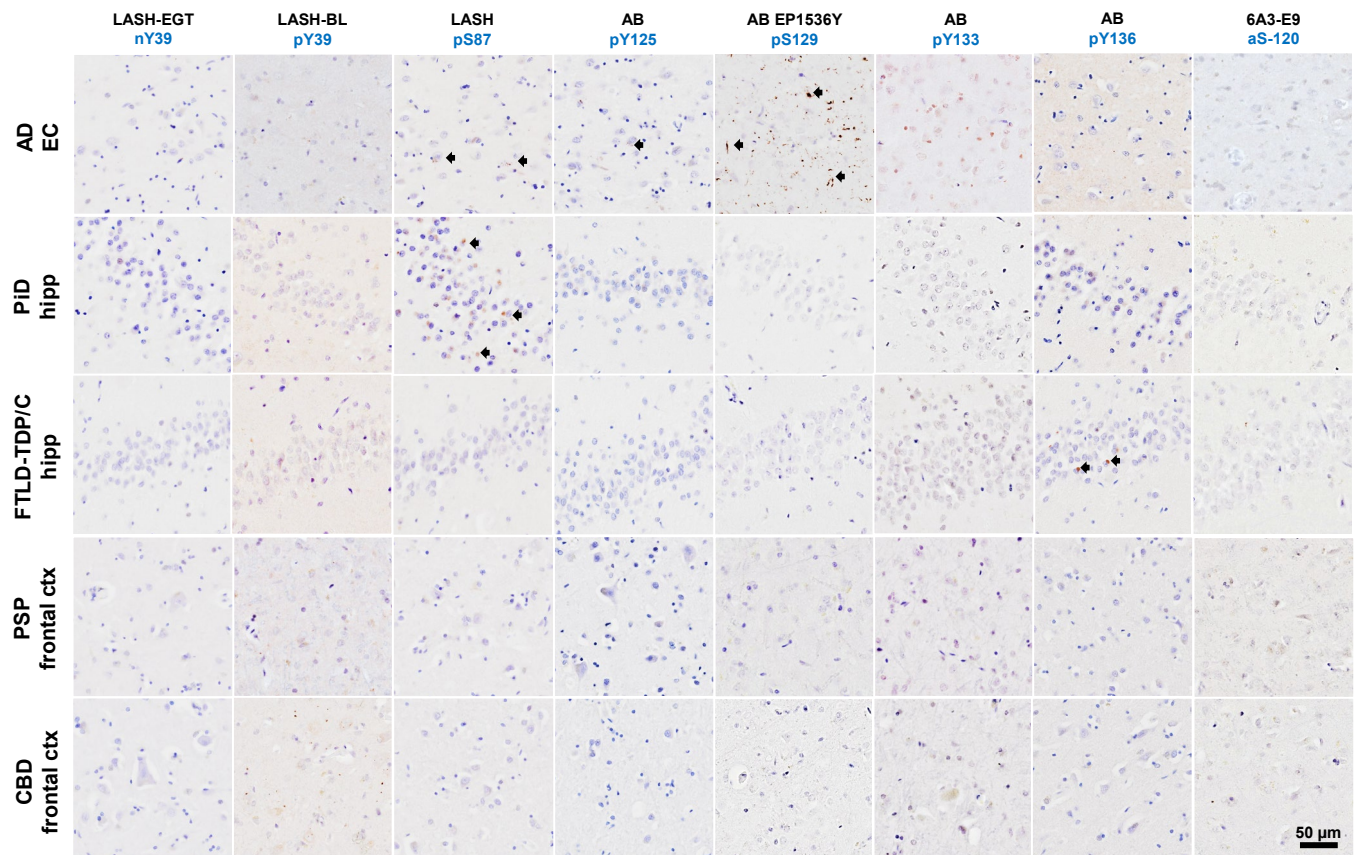

**Supplementary Figure 8: Specificity validation of aSyn antibodies on human post-mortem tissues via IHC.** The frontal cortices of PSP and CBD, and the hippocampi and the EC of AD, PiD and FTLT-DTP/C were stained using the selection of aSyn non-modified and PTM antibodies. Cross-reactivity was not observed with pathological accumulations positive for a-beta (antibody: Agilent anti-a-beta), p-tau (antibody: TF AT8) or TDP-43 (antibody: LSBio 6F/3D). Arrows indicate aSyn-positive structures detected on each tissue. Representative images taken from the entorhinal cortices (layers V-VI) and hippocampi (dentate gyrus) of AD1-2, PiD1-2 and FTLT-DTP/C1-2, and the frontal cortices (layers V-VI) of PSP1-2 and CBD1-2. a-beta = amyloid-beta; AD = Alzheimer's disease; aSyn = alpha-synuclein; CBD = corticobasal degeneration; ctx = cortex; EC = entorhinal cortex; FTLT-DTP/C = frontotemporal lobar degeneration of transactive response DNA-binding protein 43 type C; hipp = hippocampus; IHC = immunohistochemistry; PiD = Pick's disease; PSP = posterior supranuclear palsy; p-tau = phosphorylated tubulin-associated unit; PTM = post-translational modification; TDP-43 = transactive response DNA binding protein 43kDa

# SUPPLEMENTARY FIGURE 9

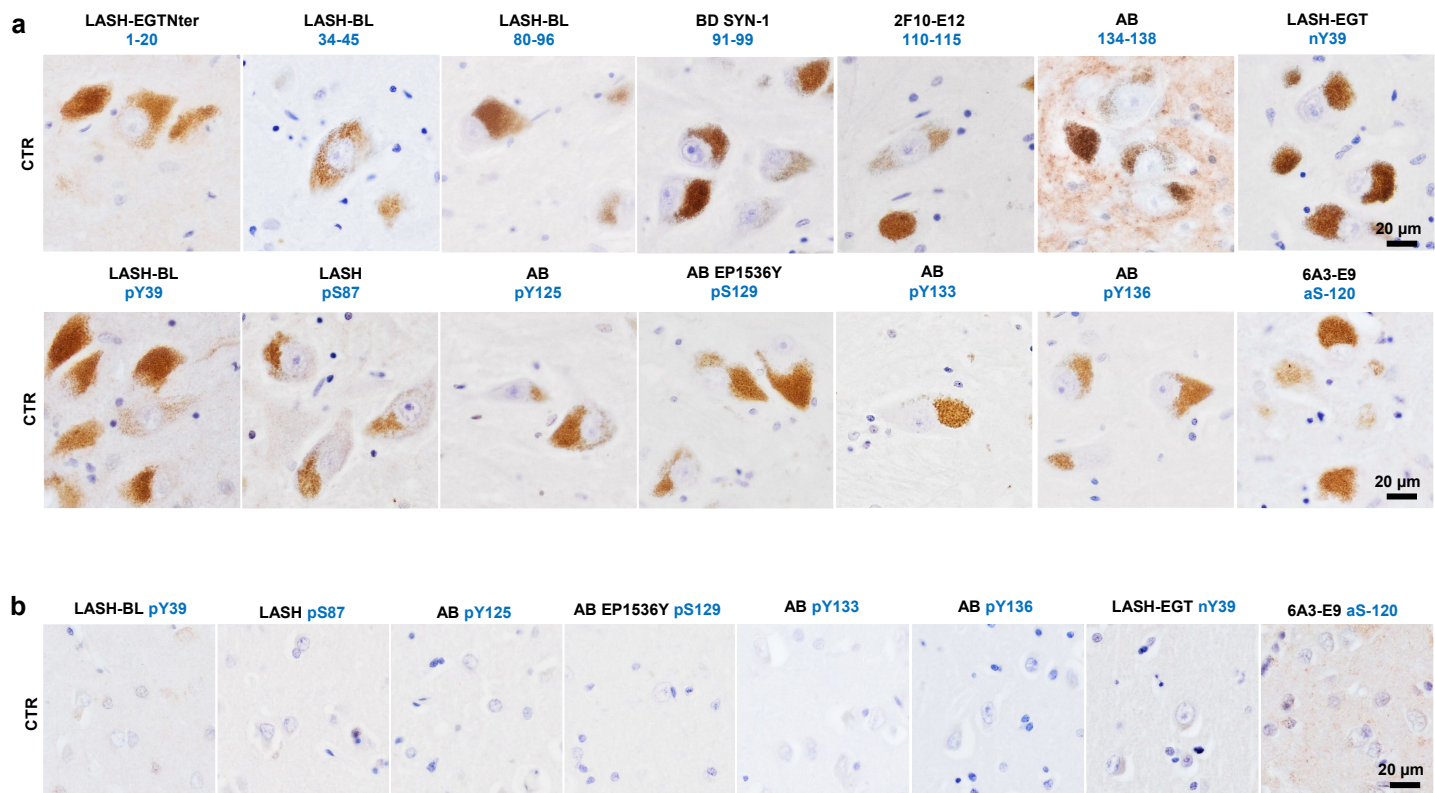

**Supplementary Figure 9: Complementary images to Figure 5b-c.** Staining of the (a) SN and (b) cingulate cortex (layers V–VI) of healthy controls with aSyn antibodies. aSyn = alpha-synuclein; CTR = control; SN = substantia nigra

**SUPPLEMENTARY FIGURE 10**

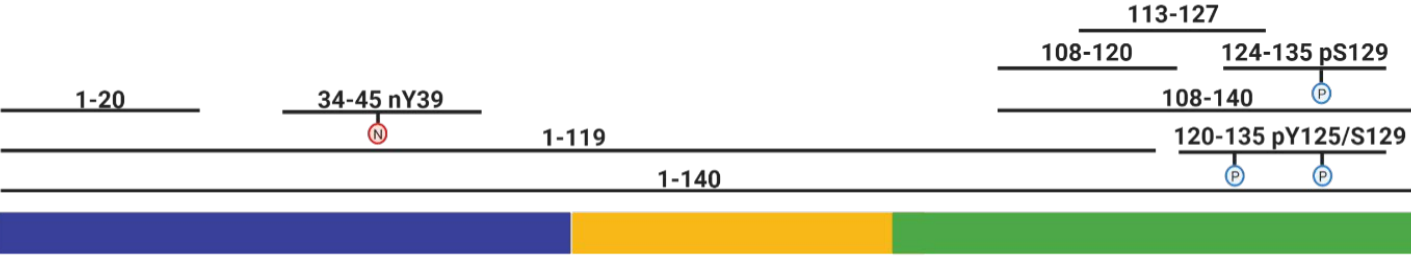

**Supplementary Figure 10: A schematic of the aSyn human proteins and peptides used for BALB/c mouse immunization.** Schematic created with Biorender.com (agreement no: NS23V1NZV8).

# Western blots uncropped

FIGURE 3

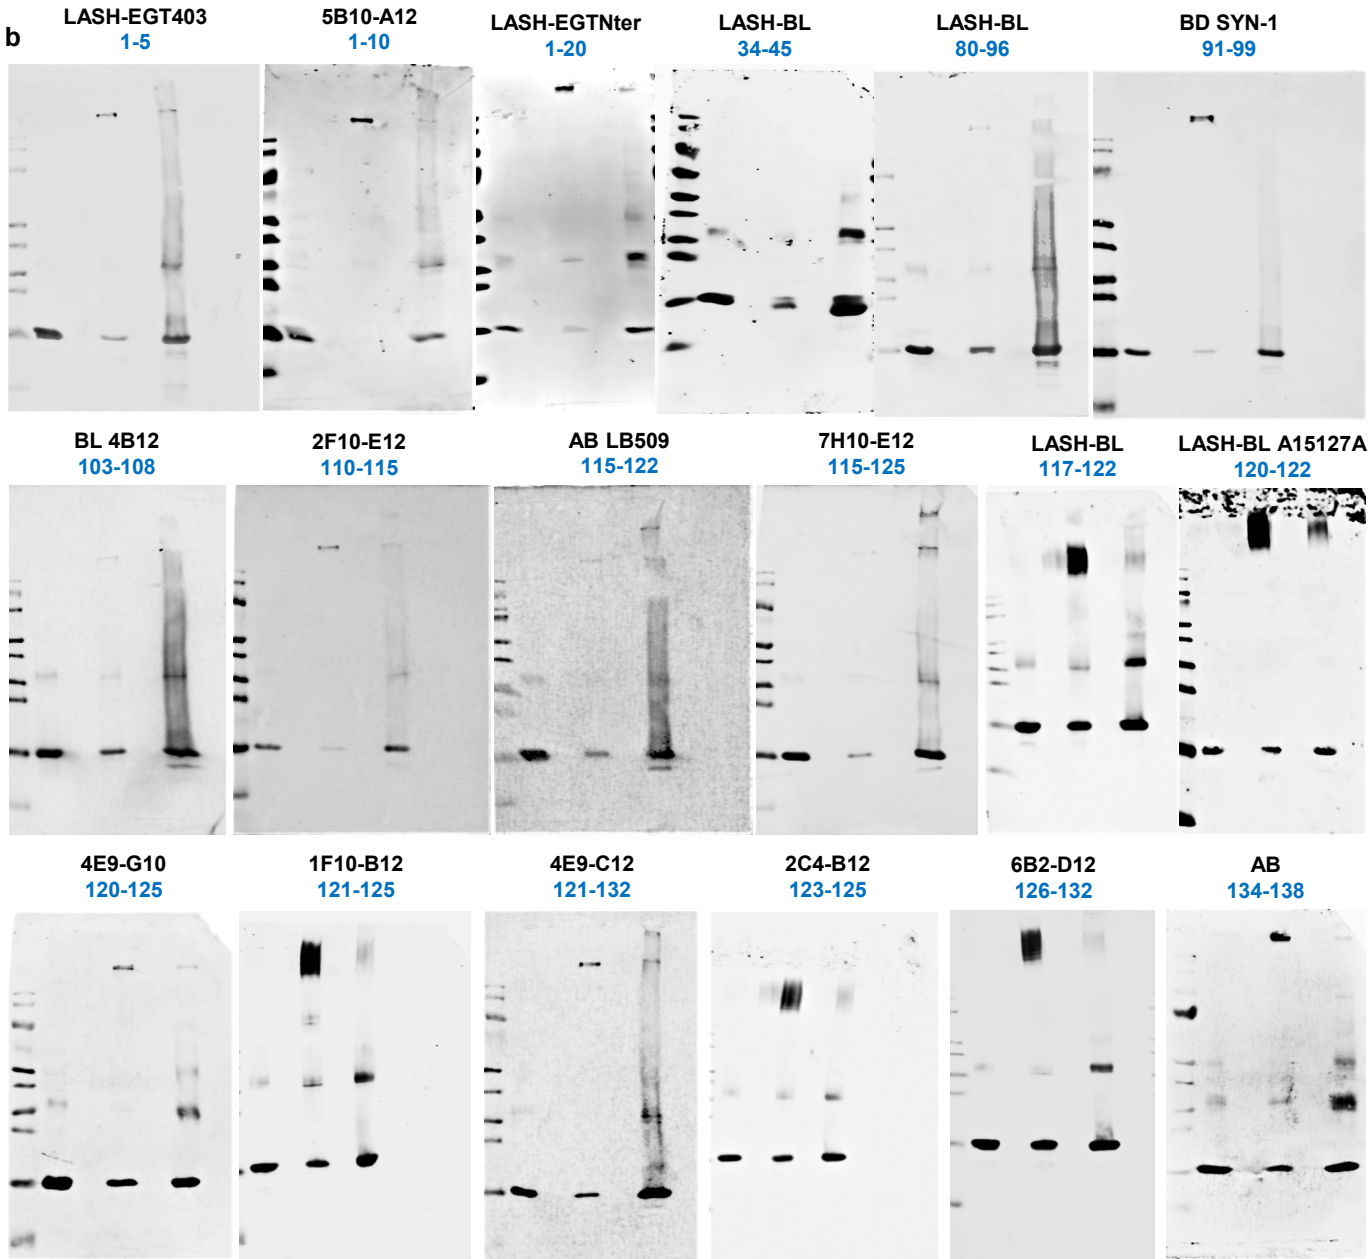



# Western blots uncropped

## SUPPLEMENTARY FIGURE 1

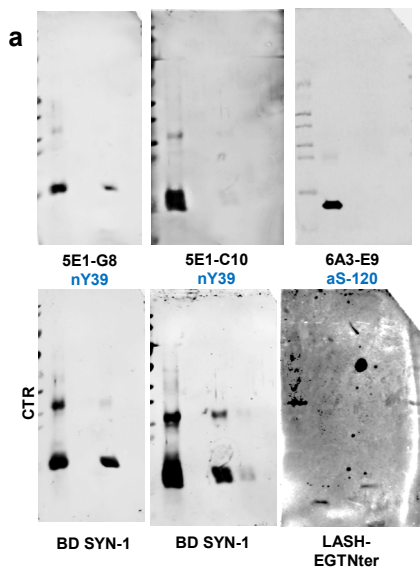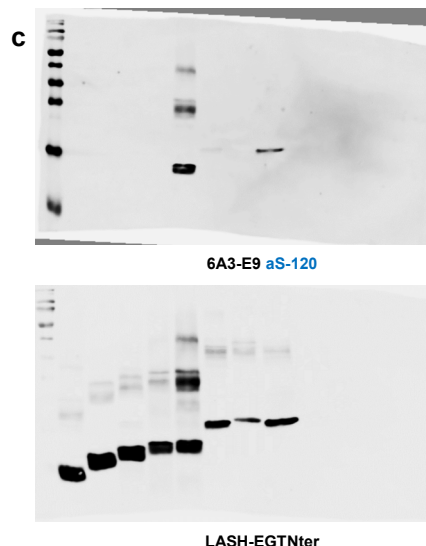





# SUPPLEMENTARY TABLES

**Supplementary Table 1:** A list of all the programmes initialised to generate monoclonal antibodies against aSyn.

| programme   | immunogen                                                  | carrier | antigen sequence                        |
|-------------|------------------------------------------------------------|---------|-----------------------------------------|
| LASH-EGT403 | UniProtKB - P37840 (SYUA_HUMAN) <b>1-20</b>                | KLH     | MDVFMKGLSK AKEGVVAAAE                   |
| LASH-EGT404 | UniProtKB - P37840 (SYUA_HUMAN) <b>1-140</b>               | na      | recombinant aSyn human FL (1-140)       |
| LASH-EGT405 | UniProtKB - P37840 (SYUA_HUMAN) <b>113-127</b>             | KLH     | LEDMPVDP DNEAYEM                        |
| LASH-EGT406 | UniProtKB - P37840 (SYUA_HUMAN) <b>108-120</b>             | KLH     | PQE GILEDMPVDP                          |
| LASH-EGT407 | UniProtKB - P37840 (SYUA_HUMAN) <b>124-135 pS129</b>       | KLH     | AYEMP(pS)E EGYQD                        |
| LASH-EGT408 | UniProtKB - P37840 (SYUA_HUMAN) <b>108-140</b>             | na      | PQE GILEDMPVDP<br>DNEAYEMPSE EGYQDYEPEA |
| LASH-EGT409 | UniProtKB - P37840 (SYUA_HUMAN) <b>120-135 pY125/pS129</b> | KLH     | P DNEA(pY)EM P(pS)E EGYQD               |
| LASH-EGT410 | UniProtKB - P37840 (SYUA_HUMAN) <b>1-119</b>               | na      | recombinant aSyn human 1-119            |
| LASH-EGT416 | UniProtKB - P37840 (SYUA_HUMAN) <b>34-45 nY39</b>          | KLH     | KEGVL(nY)VGSKTK                         |

aSyn = alpha-synuclein; FL = full-length; KLH = keyhole limpet hemocyanin; na = not available

**Supplementary Table 2:** A list of all aSyn proteins and peptides included in this study.

| aSyn protein/ peptide | Mw/ Da | aSyn protein/ peptide | Mw/ Da | aSyn protein/ peptide | Mw/ Da |
|-----------------------|--------|-----------------------|--------|-----------------------|--------|
| h/m 1-11              | 1,227  | h 39-140              | 10,600 | h pS87                | 14,540 |
| h 1-101               | 10,062 | h 65-140              | 7,872  | h pY125               | 14,540 |
| h 1-110               | 11,045 | h 71-140              | 7,374  | h pY125/S129          | 14,620 |
| h 1-114               | 11,457 | h Δ111-115            | 13,933 | h pS129               | 14,540 |
| h 1-115               | 11,572 | h Δ111-115/133-135    | 13,526 | h pY125/pY133/pY136   | 14,745 |
| h 1-119               | 12,015 | h Δ120-125            | 13,770 | m 1-120               | 12,222 |
| h 1-120               | 12,112 | h Δ133-135            | 14,054 | m Δ120-125            | 13,881 |
| h 1-122               | 12,341 | h FL                  | 14,460 | m Δ133-135            | 14,079 |
| h 1-123               | 12,470 | h Y39F                | 14,444 | m 20-140              | 12,551 |
| h 1-124               | 12,541 | h Y133/136F nY39      | 14,490 | m FL                  | 14,485 |
| h 1-133               | 13,627 | h nY39                | 14,522 | m E114A               | 14,427 |
| h 1-135               | 13,871 | h nY125               | 14,522 | m D115A               | 14,441 |
| h 5-140               | 13,968 | h pY39                | 14,540 | m pS129               | 14,580 |

aSyn = alpha-synuclein; Da = dalton; FL = full-length; h = human; m = mouse; Mw = molecular weight

**Supplementary Table 3:** A list of all the purified antibodies and their epitopes after finalisation of the monoclonal antibody generation programmes.

| antibody full name   | antibody short name | epitope  | species/clonality | isotype | reactivity | concentration (mg/mL) | amount (mg) |
|----------------------|---------------------|----------|-------------------|---------|------------|-----------------------|-------------|
| LASH-EGT403 6D10-F10 | LASH-EGT403         | 1-5      | mus mc            | IgG1 K  | hu, mus    | 1.1                   | 56.2        |
| LASH-EGT410 5B10-A12 | 5B10-A12            | 1-10     | mus mc            | IgG1 K  | hu, mus    | 1.4                   | 56.2        |
| LASH-EGT406 2F10-E12 | 2F10-E12            | 110-115  | mus mc            | IgG1 K  | hu, mus    | 1.8                   | 79.7        |
| LASH-EGT405 7H10-E12 | 7H10-E12            | 115-125  | mus mc            | IgG1 K  | hu         | 1.6                   | 38.4        |
| LASH-EGT408 4E9-C12  | 4E9-C12             | 121-132  | mus mc            | IgG1 K  | hu         | 1.2                   | 35.5        |
| LASH-EGT405 2C4-B12  | 2C4-B12             | 123-125  | mus mc            | IgG1 K  | hu         | 1.0                   | 28.7        |
| LASH-EGT408 4E9-G10  | 4E9-G10             | 120-125  | mus mc            | IgG1 K  | hu         | 0.9                   | 26.5        |
| LASH-EGT410 6B2-D12  | 6B2-D12             | 126-132  | mus mc            | IgG1 K  | hu, mus    | 1.2                   | 37.2        |
| LASH-EGT410 1F10-B12 | 1F10-B12            | 121-125  | mus mc            | IgG1 K  | hu         | 1.2                   | 36.7        |
| LASH-EGT406 6A3-E9   | 6A3-E9              | aSyn-120 | mus mc            | IgG1 K  | hu         | 1.0                   | 23.0        |
| LASH-EGT416 5E1-G8   | 5E1-G8              | nY39     | mus mc            | IgG1 K  | hu, mus    | 1.3                   | 52.2        |
| LASH-EGT416 5E1-C10  | 5E1-C10             | nY39     | mus mc            | IgG1 K  | hu, mus    | 1.3                   | 53.1        |

aSyn = alpha-synuclein; hu = human; IgG = immunoglobulin G; K = kappa; mc = monoclonal; mus = mouse

**Supplementary Table 4:** A list of all the primary and secondary antibodies used in this study.

| primary antibodies      |                |                    |            |                       |                 |             |
|-------------------------|----------------|--------------------|------------|-----------------------|-----------------|-------------|
| antibody name           | epitope        | species/ clonality | reactivity | concentration (mg/mL) | company         | catalogue # |
| LASH-EGT403             | aSyn 1-5       | mus mc             | h, m       | 1.12                  | -               | -           |
| 5B10-A12                | aSyn 1-10      | mus mc             | h, m       | 1.40                  | -               | -           |
| LASH-EGTNter            | aSyn 1-20      | rab pc             | h, m       | 1.34                  | -               | -           |
| LASH-BL 34-45           | aSyn 34-45     | mus mc             | h, m       | 1.00                  | Biolegend       | 849102      |
| LASH-BL 80-96           | aSyn 80-96     | mus mc             | h, m       | 1.00                  | Biolegend       | 848302      |
| BD SYN-1                | aSyn 91-99     | mus mc             | h, m       | 0.25                  | BD Transduction | BD610787    |
| BL 4B12                 | aSyn 103-108   | mus mc             | h          | 1.00                  | Biolegend       | 807801      |
| 2F10-E12                | aSyn 110-115   | mus mc             | h, m       | 1.81                  | -               | -           |
| AB LB509                | aSyn 115-122   | mus mc             | h          | 1.00                  | Abcam           | ab27766     |
| 7H10-E12                | aSyn 115-125   | mus mc             | h          | 1.60                  | -               | -           |
| LASH-BL 117-122         | aSyn 117-122   | mus mc             | h          | 1.53                  | Biolegend       | 848601      |
| LASH-BL A15127A         | aSyn 120-122   | mus mc             | h          | 5.19                  | Biolegend       | 848401      |
| 4E9-G10                 | aSyn 120-125   | mus mc             | h          | 0.89                  | -               | -           |
| 1F10-B12                | aSyn 121-125   | mus mc             | h          | 1.23                  | -               | -           |
| 4E9-C12                 | aSyn 121-132   | mus mc             | h          | 1.18                  | -               | -           |
| 2C4-B12                 | aSyn 123-125   | mus mc             | h          | 0.96                  | -               | -           |
| 6B2-D12                 | aSyn 126-132   | mus mc             | h, m       | 1.24                  | -               | -           |
| AB 134-138              | aSyn 134-138   | rab pc             | h, m       | 1.00                  | Abcam           | ab131508    |
| LASH-BL pY39            | aSyn pY39      | mus mc             | h          | 1.00                  | Biolegend       | 849201      |
| LASH-EGT pY39           | aSyn pY39      | rab pc             | h, m       | 0.50                  | -               | -           |
| LASH pS87               | aSyn pS87      | rab pc             | h          | 0.40                  | -               | -           |
| LASH-EGT pY125          | aSyn pY125     | rab pc             | h          | 0.20                  | -               | -           |
| AB pY125                | aSyn pY125     | rab pc             | h          | 0.50                  | Abcam           | ab10789     |
| AB EP1536Y              | aSyn pS129     | rab mc             | h, m       | 2.68                  | Abcam           | ab51253     |
| LASH-EGT pS129          | aSyn pS129     | rab pc             | h, m       | 0.10                  | -               | -           |
| BL 81A                  | aSyn pS129     | mus mc             | h, m       | 1.00                  | Biolegend       | 825701      |
| BL 81A biotin           | aSyn pS129     | mus mc             | h, m       | 0.50                  | Biolegend       | 824704      |
| AB MJF-R13              | aSyn pS129     | rab mc             | h, m       | 4.20                  | Abcam           | ab168381    |
| AB pY133                | aSyn pY133     | rab pc             | h, m       | 1.50                  | Abcam           | ab194910    |
| AB pY136                | aSyn pY136     | rab pc             | h, m       | 1.00                  | Abcam           | ab131491    |
| LASH-EGT nY39           | aSyn nY39      | rab pc             | h, m       | 0.53                  | -               | -           |
| 5E1-G8                  | aSyn nY39      | mus mc             | h, m       | 1.31                  | -               | -           |
| 5E1-C10                 | aSyn nY39      | mus mc             | h, m       | 1.27                  | -               | -           |
| 6A3-E9                  | aSyn-120       | mus mc             | h          | 0.96                  | -               | -           |
| AB $\beta$ -actin AC-15 | $\beta$ -actin | mus mc             | h, m       | 1.00                  | Abcam           | ab6276      |
| AB anti-MAP2            | MAP2           | ch pc              | m, r       | na                    | Abcam           | ab5392      |
| TF AT8                  | tau pS202/T205 | mus mc             | h, m, r    | 0.20                  | ThermoFisher    | MN1020      |
| Agilent 6F/3D           | a-beta         | mus mc             | h          | na                    | Agilent         | M0872       |
| LSBio 2E2-D3            | TDP-43         | mus mc             | h          | 0.48                  | LSBio           | LS-B4521    |

#### secondary antibodies

| antibody name                      | concentration (mg/mL) | company      | catalogue # |
|------------------------------------|-----------------------|--------------|-------------|
| DAPI 461                           | 2.00                  | ThermoFisher | D1306       |
| goat anti-mouse Alexa Fluor 488    | 2.00                  | ThermoFisher | A-11029     |
| donkey anti-rabbit Alexa Fluor 488 | 2.00                  | ThermoFisher | A-21206     |
| goat anti-chicken Alexa Fluor 568  | 2.00                  | ThermoFisher | A-11041     |
| donkey anti-rabbit Alexa Fluor 568 | 2.00                  | ThermoFisher | A-10042     |
| donkey anti-mouse Alexa Fluor 647  | 2.00                  | ThermoFisher | A-31571     |
| donkey anti-rabbit Alexa Fluor 647 | 2.00                  | ThermoFisher | A-31573     |
| IRDye 680RD goat anti-mouse        | -                     | Li-Cor       | 926-68070   |
| IRDye 800CW goat anti-rabbit       | -                     | Li-Cor       | 926-32211   |

a-beta = amyloid-beta; aSyn = alpha-synuclein; ch = chicken; h = human; MAP2 = microtubule-associated protein 2; mc = monoclonal; mus or m = mouse; pc = polyclonal; rab or r = rabbit; tau = tubulin-associated unit; TDP-43 = transactive response DNA-binding protein 43kDa

**Supplementary Table 5:** Optimised IHC settings for the antibodies used on human post-mortem brain tissues.

| antibody        | epitope        | IHC: dilution | IHC: antigen retrieval | IF: dilution* |
|-----------------|----------------|---------------|------------------------|---------------|
| LASH-EGT403     | aSyn 1-5       | 1:50          | FA                     | na            |
| 5B10-A12        | aSyn 1-10      | 1:5,000       | AC+FA                  | na            |
| LASH-EGTNter    | aSyn 1-20      | 1:15,000      | AC+FA                  | 1:2,000       |
| LASH-BL 34-45   | aSyn 34-45     | 1:30,000      | FA                     | 1:10,000      |
| LASH-BL 80-96   | aSyn 80-96     | 1:20,000      | FA                     | na            |
| BD SYN-1        | aSyn 91-99     | 1:5,000       | FA                     | na            |
| BL 4B12         | aSyn 103-108   | 1:100,000     | AC+FA                  | 1:5,000       |
| 2F10-E12        | aSyn 110-115   | 1:10,000      | FA                     | 1:500         |
| AB LB509        | aSyn 115-122   | 1:25,000      | AC+FA                  | na            |
| 7H10-E12        | aSyn 115-125   | 1:9,000       | AC+FA                  | na            |
| LASH-BL 117-122 | aSyn 117-122   | 1:80,000      | AC+FA                  | na            |
| LASH-BL A15127A | aSyn 120-122   | 1:15,000      | AC+FA                  | na            |
| 4E9-G10         | aSyn 120-125   | 1:4,000       | AC+FA                  | na            |
| 1F10-B12        | aSyn 121-125   | 1:15,000      | AC+FA                  | na            |
| 4E9-C12         | aSyn 121-132   | 1:10,000      | AC+FA                  | na            |
| 2C4-B12         | aSyn 123-125   | 1:12,000      | AC+FA                  | na            |
| 6B2-D12         | aSyn 126-132   | 1:500         | FA                     | na            |
| AB 134-138      | aSyn 134-138   | 1:25,000      | AC+FA                  | 1:100         |
| LASH-BL pY39    | aSyn pY39      | 1:2,000       | AC+FA                  | na            |
| LASH-EGT pY39   | aSyn pY39      | 1:500         | AC+FA                  | 1:50          |
| LASH pS87       | aSyn pS87      | 1:600         | FA                     | na            |
| LASH-EGT pY125  | aSyn pY125     | 1:100         | FA                     | na            |
| AB pY125        | aSyn pY125     | 1:500         | FA                     | na            |
| AB EP1536Y      | aSyn pS129     | 1:60,000      | AC+FA                  | na            |
| LASH-EGT pS129  | aSyn pS129     | 1:200         | FA                     | na            |
| AB pY133        | aSyn pY133     | 1:400         | AC+FA                  | na            |
| AB pY136        | aSyn pY136     | 1:100         | FA                     | na            |
| LASH-EGT nY39   | aSyn nY39      | 1:1,000       | FA                     | na            |
| 5E1-G8          | aSyn nY39      | 1:4,000       | AC+FA                  | na            |
| 5E1-C10         | aSyn nY39      | 1:250         | AC+FA                  | na            |
| 6A3-E9          | aSyn-120       | 1:2,500       | AC+FA                  | na            |
| BL 81A biotin   | aSyn pS129     | na            | na                     | 1:500         |
| TF AT8          | tau pS202/T205 | 1:600         | AC+FA                  | na            |
| Agilent 6F/3D   | a-beta         | 1:100         | AC+FA                  | na            |
| LSBio 2E2-D3    | TDP-43         | 1:8,000       | AC                     | na            |

\*AC+FA pre-treatment was applied in IF studies for all antibodies. a-beta = amyloid-beta; AC = autoclave; aSyn = alpha-synuclein; FA = formic acid; IF = immunofluorescence; IHC = immunohistochemistry; na = not applicable; tau = tubulin associated unit; TDP-43 = transactive response DNA-binding protein 43kDa
